# Supplementary material for: Combined Inhibition of Polo-Like Kinase-1 and Wee1 as a New Therapeutic Strategy to Induce Apoptotic Cell Death in Neoplastic Mast Cells
Source: MDPI journal article supplement (doi:10.3390/cancers14030738), 2022-01-31
Supplement: s1 [file s1]

## Supplementary reports:

A dose-escalation experiment was performed to define the drug doses required to induce sub-lethal effects in HMC-1.1 and HMC-1.2 cell lines. For this purpose, each drug, alone or in combination, was added at scalar doses into the cell culture medium, starting from 0.25 to 1  $\mu\text{M}$ . After 24 hours treatment cells were evaluated for Annexin V uptake and the percentage of residual living cells was used to calculate IC<sub>50</sub> values by using a dedicated software (Compusyn).

Compusyn reports are shown below.

Data for Drug: MK1775 [ $\mu\text{M}$ ] in HMC-1.2 cell line

| Dose ( $\mu\text{M}$ ) | Effect (% of living cells) |
|------------------------|----------------------------|
| 0.25                   | 0.92                       |
| 0.5                    | 0.87                       |
| 0.75                   | 0.69                       |
| 1.0                    | 0.55                       |

4 data points entered.

Data for Drug: volasertib [ $\mu\text{M}$ ]

| Dose ( $\mu\text{M}$ ) | Effect (% of living cells) |
|------------------------|----------------------------|
| 0.25                   | 0.85                       |
| 0.5                    | 0.68                       |
| 0.75                   | 0.51                       |
| 1.0                    | 0.43                       |

4 data points entered.

Data for Drug: danusertib [ $\mu\text{M}$ ]

| Dose ( $\mu\text{M}$ ) | Effect (% of living cells) |
|------------------------|----------------------------|
| 0.25                   | 0.88                       |
| 0.5                    | 0.72                       |
| 0.75                   | 0.53                       |
| 1.0                    | 0.48                       |

4 data points entered.

Data for Drug Combo: (MK1775+danusertib [1:1])

| Dose ( $\mu\text{M}$ ) | Effect (% of living cells) |
|------------------------|----------------------------|
| 0.25                   | 0.62                       |
| 0.5                    | 0.54                       |
| 0.75                   | 0.27                       |
| 1.0                    | 0.13                       |

4 data points entered.

| Total Dose ( $\mu\text{M}$ ) | Effect (% of living cells) | CI Value |
|------------------------------|----------------------------|----------|
| 0.5                          | 0.62                       | 0.65277  |
| 1.0                          | 0.54                       | 1.06118  |
| 1.5                          | 0.27                       | 0.76950  |
| 2.0                          | 0.13                       | 0.58012  |

Data for Drug Combo: (MK1775+volasertib [1:1])

| Dose ( $\mu\text{M}$ ) | Effect (% of living cells) |
|------------------------|----------------------------|
| 0.25                   | 0.60                       |
| 0.5                    | 0.51                       |
| 0.75                   | 0.19                       |
| 1.0                    | 0.10                       |

4 data points entered.

| Total Dose ( $\mu\text{M}$ ) | Effect (% of living cells) | CI Value |
|------------------------------|----------------------------|----------|
| 0.5                          | 0.60                       | 0.50261  |
| 1.0                          | 0.51                       | 1.00001  |
| 1.5                          | 0.19                       | 0.65120  |
| 2.0                          | 0.10                       | 0.42010  |

Data for Drug: MK1775 [ $\mu\text{M}$ ] in HMC-1.1 cell line

| Dose ( $\mu\text{M}$ ) | Effect (% of living cells) |
|------------------------|----------------------------|
| 0.25                   | 0.98                       |
| 0.5                    | 0.92                       |
| 0.75                   | 0.70                       |
| 1.0                    | 0.58                       |

4 data points entered.

---

Data for Drug: volasertib [ $\mu\text{M}$ ]

| Dose ( $\mu\text{M}$ ) | Effect (% of living cells) |
|------------------------|----------------------------|
| 0.25                   | 0.91                       |
| 0.5                    | 0.72                       |
| 0.75                   | 0.61                       |
| 1.0                    | 0.48                       |

4 data points entered.

---

Data for Drug: danusertib [ $\mu\text{M}$ ]

| Dose ( $\mu\text{M}$ ) | Effect (% of living cells) |
|------------------------|----------------------------|
| 0.25                   | 0.81                       |
| 0.5                    | 0.68                       |
| 0.75                   | 0.47                       |
| 1.0                    | 0.35                       |

4 data points entered.

## Data for Drug Combo: (MK1775+danusertib [1:1])

| Dose ( $\mu$ M) | Effect (% of living cells) |
|-----------------|----------------------------|
| 0.25            | 0.57                       |
| 0.5             | 0.49                       |
| 0.75            | 0.21                       |
| 1.0             | 0.09                       |

4 data points entered.

| Total Dose ( $\mu$ M) | Effect (% of living cells) | CI Value |
|-----------------------|----------------------------|----------|
| 0.5                   | 0.57                       | 0.61423  |
| 1.0                   | 0.49                       | 1.01253  |
| 1.5                   | 0.21                       | 0.82475  |
| 2.0                   | 0.09                       | 0.52140  |

## Data for Drug Combo: (MK1775+volasertib [1:1])

| Dose ( $\mu$ M) | Effect (% of living cells) |
|-----------------|----------------------------|
| 0.25            | 0.60                       |
| 0.5             | 0.51                       |
| 0.75            | 0.19                       |
| 1.0             | 0.10                       |

4 data points entered.

| Total Dose ( $\mu$ M) | Effect (% of living cells) | CI Value |
|-----------------------|----------------------------|----------|
| 0.5                   | 0.60                       | 0.50261  |
| 1.0                   | 0.51                       | 1.00001  |
| 1.5                   | 0.19                       | 0.82456  |
| 2.0                   | 0.10                       | 0.42010  |
