# Supplementary material for: Combined Inhibition of Polo-Like Kinase-1 and Wee1 as a New Therapeutic Strategy to Induce Apoptotic Cell Death in Neoplastic Mast Cells
Source: MDPI journal article supplement (doi:10.3390/cancers14030738), 2022-01-31
Supplement: s1 [file s1]

FIGURE 1 E

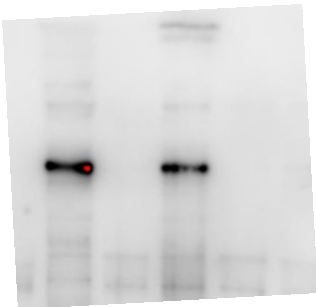

FIGURE 1 E LANE 1

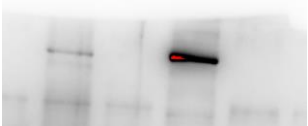

FIGURE 1 E LANE 2

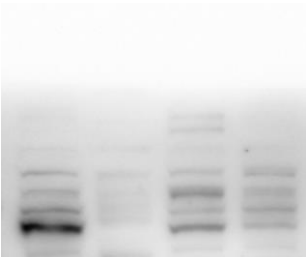

FIGURE 1 E LANE 3

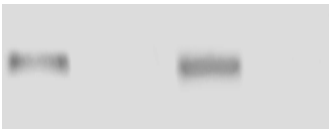

FIGURE 1 E LANE 4

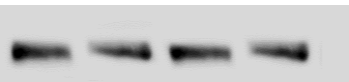

FIGURE 1 E LANE 5

FIGURE 1 F

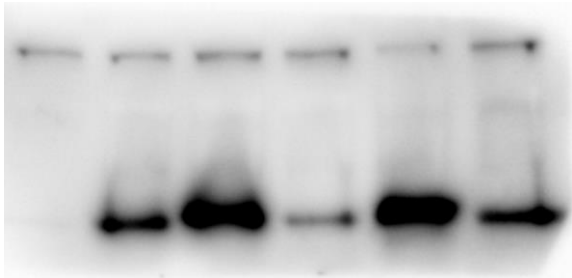

FIGURE 1 F LANE 1

FIGURE 1 F LANE 2

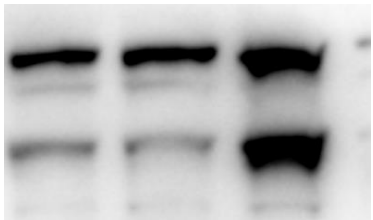

FIGURE 1 F HMC-1.1 LANE 3

FIGURE 1 F HMC-1.1 LANE 4

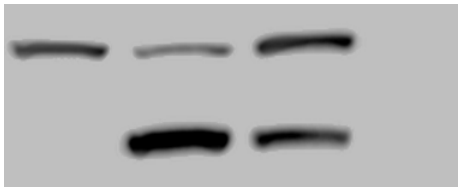

FIGURE 1 F HMC-1.2 LANE 3

FIGURE 1 F HMC-1.2 LANE 4

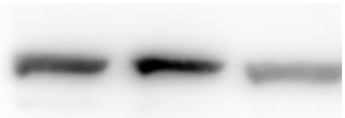

FIGURE 1 F HMC-1.1 LANE 5

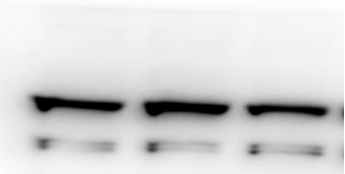

FIGURE 1 F HMC-1.2 LANE 5

FIGURE 2 B

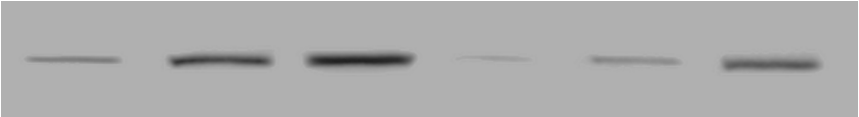

FIGURE 2 B LANE 1

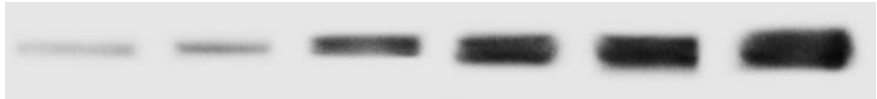

FIGURE 2 B LANE 2

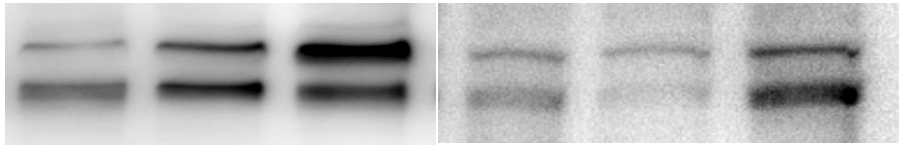

FIGURE 2 B LANE 3

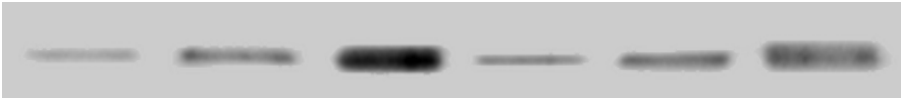

FIGURE 2 B LANE 4

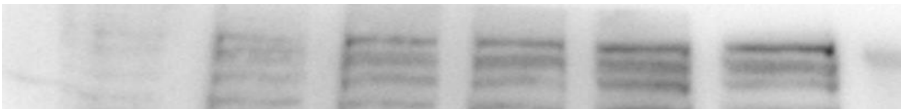

FIGURE 2 B LANE 5

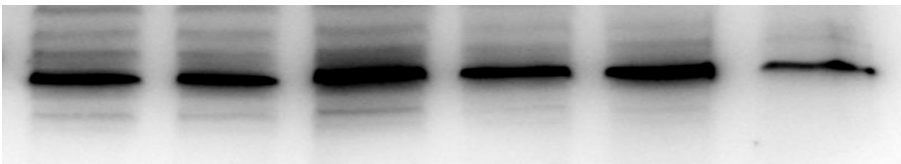

FIGURE 2 B LANE 6

FIGURE 3 C

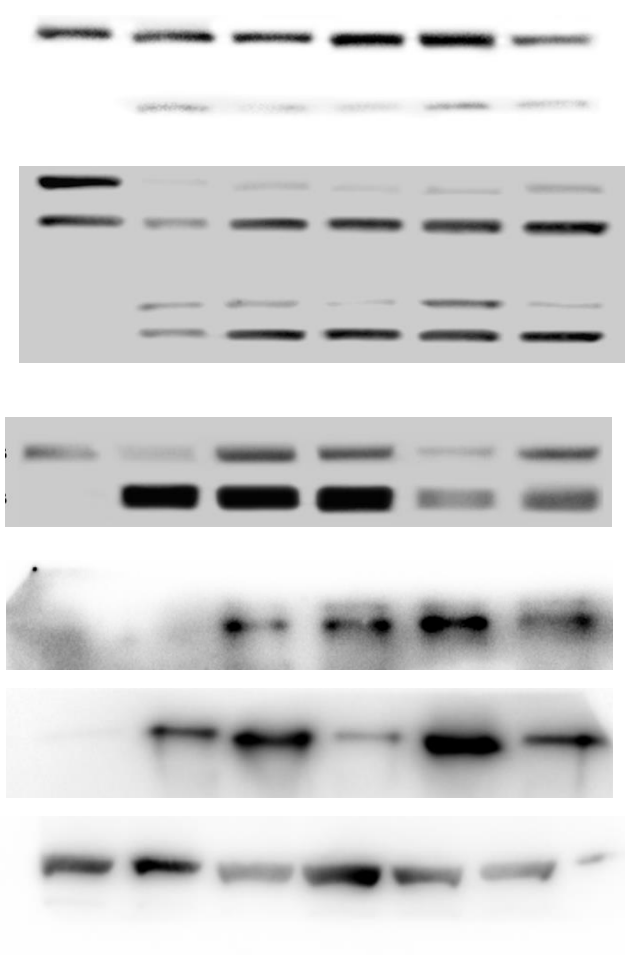

FIGURE 3 C LANE 5

FIGURE 3 C LANE 4

FIGURE 3 C LANE 6

FIGURE 3 C LANE 7

FIGURE 3 C LANE 8

FIGURE 3 C LANE 9

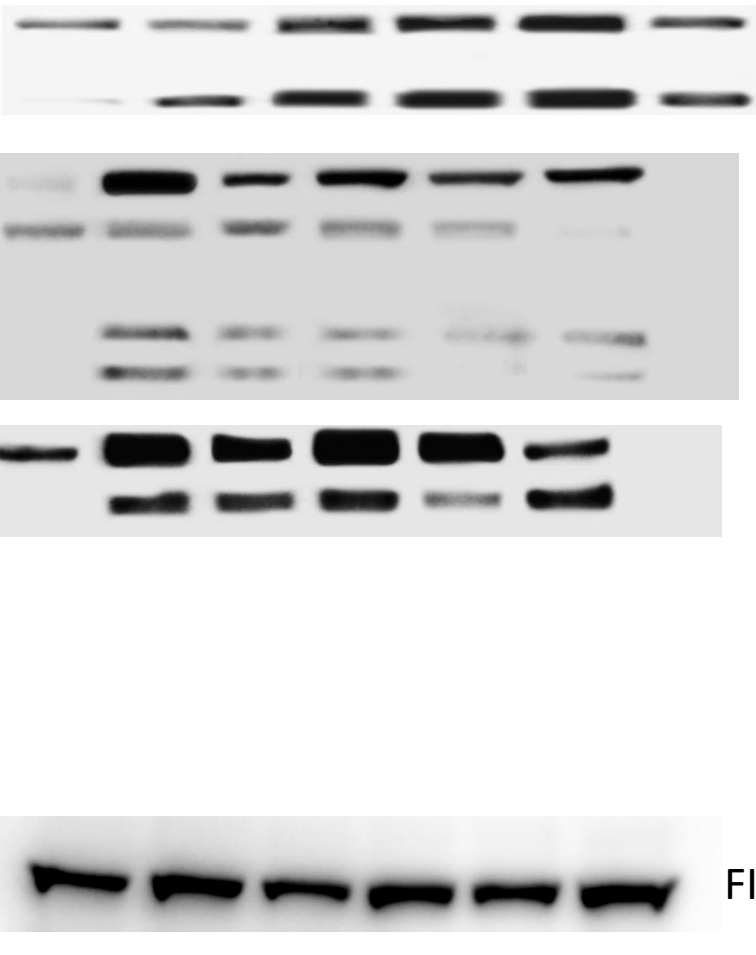

FIGURE 3 D LANE 5

FIGURE 3 D LANE 4

FIGURE 3 D LANE 6

FIGURE 3 D LANE 9
